# Supplementary material for: Optimised anthropometric indices as predictive screening tools for metabolic syndrome in adults: a cross-sectional study
Source: HighWire-hosted journal article supplement (doi:10.1136/bmjopen-2020-043952), 2021-01-01
Supplement: bmjopen-2020-043952supp001_data_supplement.pdf [file bmjopen-2020-043952supp001_data_supplement.pdf]

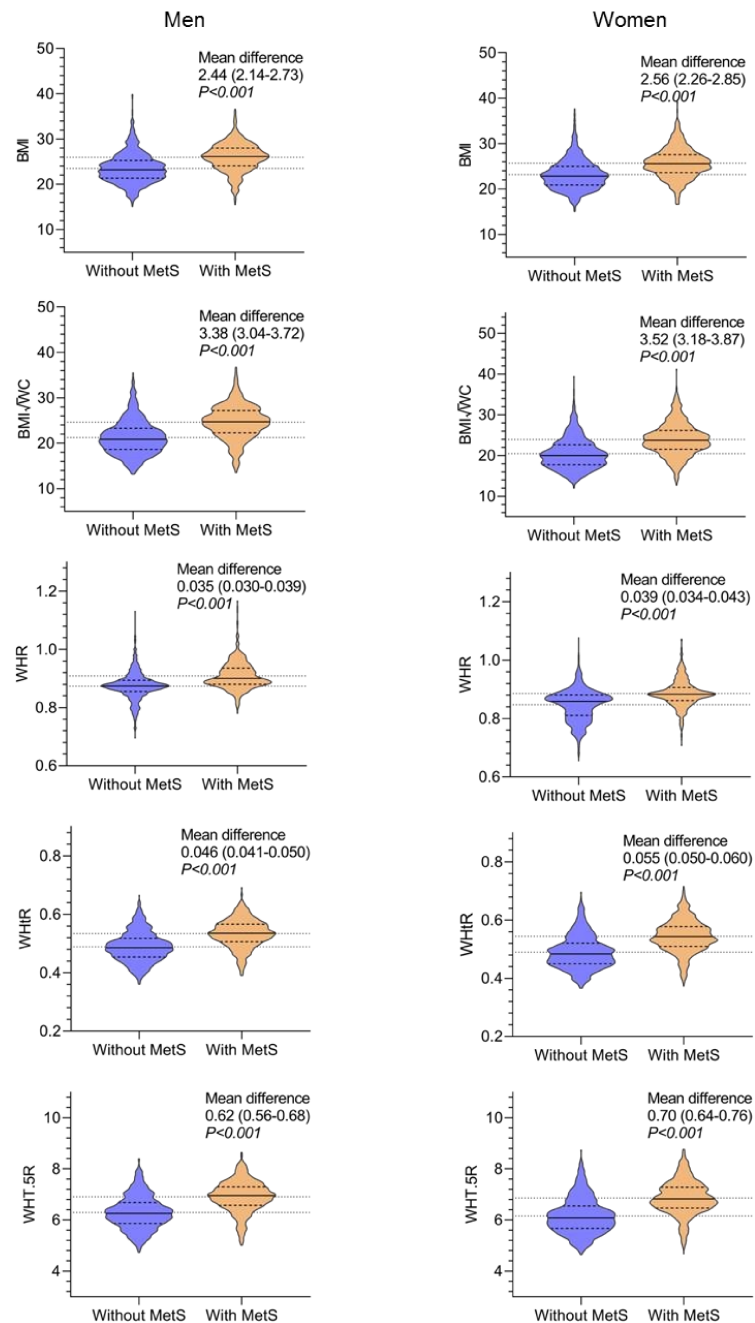

S1 Figure. Violin plots for obesity indices (BMI, BMI/WC, WHR, WHtR, and WHT.5R). The dotted line was on the mean.
